# Supplementary material for: Exosomal MicroRNA from Blood Plasma as a Predictive Biomarker for Bleeding Tendency in Dengue Infection
Source: Research Square preprint supplement (doi:10.21203/rs.3.rs-7974237/v1), 2025-11-18
Supplement: Supplementary file 1 [file a1aa4cc48c62d51793fe8793.docx]

| **Supplementary 1:** RNA 6000 Pico Chip Analysis Report | | | | |
| --- | --- | --- | --- | --- |
| **Sample** | **RNA Area** | **RNA Concentration (pg/μl)** | **rRNA Contamination (%)** | **Graphical representation** |
| DWWS1 | 1,926.50 | 10,341 | 0 | 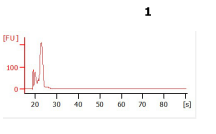 |
| DWWS2 | 738.7 | 3,965 | 0 | 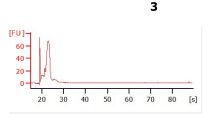 |
| DWWS3 | 2,916.90 | 15,657 | 0 | 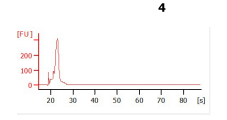 |
| DWWS4 | 510.1 | 2,738 | 0 | 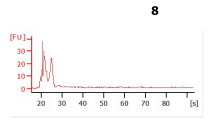 |
| DWoWS1 | 281.2 | 1,620 | 0 | 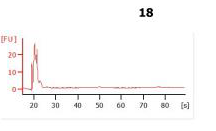 |
| DWoWS2 | 87.8 | 506 | 0 | 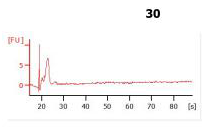 |
| DWoWS3 | 71.7 | 413 | 0 | 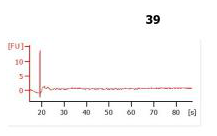 |
| DWoWS4 | 53.1 | 306 | 0 | 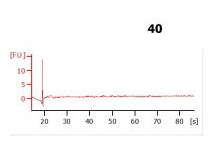 |
